# Supplementary material for: Coordination chemistry of a terpyridine-tris(pyrazolyl) ditopic ligand
Source: Royal Society of Chemistry journal article supplement (doi:10.1039/b509324d), 2005-01-01
Supplement: b509324d.pdf [file b509324d.pdf]

## Preparations

**Ru(pzt)Cl<sub>3</sub>, 3.** To 125 mL of absolute ethanol in a 200 mL round-bottom flask was added RuCl<sub>3</sub>·3H<sub>2</sub>O (0.033 g, 0.124 mmol) and ligand pzt (0.070 g, 0.124 mmol). The mixture was heated at reflux for about 3 h while vigorous magnetic stirring was maintained. After this time the reaction was cooled to room temperature, and the fine brown powder which had appeared was filtered from the red-brown solution. The product was washed with 3 × 30 mL portions of diethyl ether and air-dried. Yield 0.0724 g, 75 %.

**[Ru(pzt)<sub>2</sub>](PF<sub>6</sub>)<sub>2</sub>, 4.** Ligand pzt (0.083 g, 0.147 mmol) and Ru(pzt)Cl<sub>3</sub> complex (0.072 g, 0.074 mmol) in dry MeOH (50 mL) in presence of *N*-methylmorpholine (12 drops) were heated at reflux for 4h under Ar. The deep red solution was cooled to room temperature before it was filtered to remove any unreacted materials. The solution was taken to dryness under vacuum and the residue was purified by column chromatography (SiO<sub>2</sub> eluting with CH<sub>3</sub>CN-saturated KNO<sub>3</sub> solution-H<sub>2</sub>O, 10 :2 :1). An excess of NH<sub>4</sub>PF<sub>6</sub> was added to the major red-brown fraction and the solution was reduced in volume under vacuum. The precipitate was collected by filtration over Celite, before it was dissolved in CH<sub>3</sub>CN, and evaporated to dryness *in vacuo* to afford [Ru(pzt)<sub>2</sub>](PF<sub>6</sub>)<sub>2</sub> as a red-brown powder. Yield 0.095g, 79 %. <sup>1</sup>H NMR (500 MHz; solvent acetone-d<sub>6</sub>, see Table 3). <sup>13</sup>C NMR (75 MHz; solvent acetone-d<sub>6</sub>) δ 158.8, 156.0, 152.8 (C<sub>6</sub>, C<sub>6</sub>"), 148.3, 141.0 (C<sub>03</sub>, C<sub>03</sub>', C<sub>03</sub>"'), 140.5, 138.5 (C<sub>4</sub>, C<sub>4</sub>"), 136.4, 131.2 (C<sub>05</sub>, C<sub>05</sub>', C<sub>05</sub>"'), 128.9 (C<sub>3</sub>"', C<sub>5</sub>"') , 128.0 (C<sub>2</sub>"', C<sub>2</sub>"', C<sub>5</sub>, C<sub>5</sub>"'), 125.0 (C<sub>3</sub>, C<sub>3</sub>"'), 121.7 (C<sub>3</sub>', C<sub>5</sub>'). 106.4 (C<sub>05</sub>, C<sub>05</sub>', C<sub>05</sub>"'), 73.4 (C<sub>01</sub>), 73.06 (C<sub>7</sub>). IR (KBr, cm<sup>-1</sup>): 108.8, 106.4(C<sub>04</sub>, C<sub>04</sub>', C<sub>04</sub>"'), 73.4 (C<sub>01</sub>), 73.0 (C<sub>7</sub>). IR (KBr, cm<sup>-1</sup>): 2960 w, 2920 w, 2850 w, 1609 msh, 1408 m, 1204 w, 849 ssh, 787 msh, 756 msh, 559 ssh. ES-MS:

$m/z$  1377.6 ( $[M-PF_6]^+$ ), 616.3 ( $[M-2PF_6]^{2+}$ ). UV-vis ( $CH_3CN$ ):  $\lambda_{max}$  ( $\epsilon$ ) = 284.9 (68100), 310.0 (62700), 490.1 (22000) nm ( $L\ mol^{-1}\ cm^{-1}$ ).

**[(ttp)Ru(pzt)](PF<sub>6</sub>)<sub>2</sub>, 5.** Ru(ttp)Cl<sub>3</sub> (0.265 g, 0.50 mmol) was added to pzt (0.283 g, 0.50 mmol) in MeOH (20 mL). 10 drops of *N*-methylmorpholine was added. The solution was heated to reflux with stirring for 1 hr. The resulting deep-red solution was filtered through Celite to remove any unreacted [Ru(ttp)Cl<sub>3</sub>] and excess methanolic solution of ammonium hexafluorophosphate was added to the filtrate to precipitate the ligand complexes. Further purification was achieved by column chromatography over silica eluting with CH<sub>3</sub>CN-saturated KNO<sub>3</sub> solution-H<sub>2</sub>O (17: 0.5: 1). The major orange-red band was collected. The complex was isolated as its PF<sub>6</sub><sup>-</sup> salt as a red powder. Yield 0.6 g, 94%. <sup>1</sup>H NMR (500 MHz; solvent acetone-d<sub>6</sub>, see Table 3). <sup>13</sup>C NMR (75 MHz; solvent acetone-d<sub>6</sub>)  $\delta$  158.82, 158.74, 156.03, 155.93, 152.82 (C<sub>6</sub>, C<sub>6''</sub>), 148.56, 148.19, 141.03 (C<sub>03</sub>, C<sub>03'</sub>, C<sub>03''</sub>), 140.43, 138.44 (C<sub>4</sub>, C<sub>4''</sub>), 136.37, 133.95, 131.16 (C<sub>05</sub>, C<sub>05'</sub>, C<sub>05''</sub>), 130.43 (C<sub>3'''</sub>(ttp), C<sub>5'''</sub>(ttp)), 128.92 (C<sub>3'''</sub>(pzt), C<sub>5'''</sub>(pzt)), 128.00 (C<sub>2'''</sub>(pzt), C<sub>6'''</sub>(pzt), C<sub>5</sub>(pzt), C<sub>5''</sub>(pzt)), 127.96 (C<sub>2'''</sub>(ttp), C<sub>6'''</sub>(ttp), C<sub>5</sub>(ttp), C<sub>5''</sub>(ttp)), 125.00 (C<sub>3</sub>, C<sub>3''</sub>), 121.68 (C<sub>3</sub>(pzt), C<sub>5</sub>(pzt)), 121.34 (C<sub>3</sub>(ttp), C<sub>5</sub>(ttp)), 106.37 (C<sub>05</sub>, C<sub>05'</sub>, C<sub>05''</sub>), 73.37 (C<sub>01</sub>), 73.06 (C<sub>7</sub>), 20.69 (CH<sub>3</sub>(ttp)). IR (KBr, cm<sup>-1</sup>): 3080 w, 2950 w, 2852 w, 1605 ssh, 1520 m, 1408 msh, 1327 m, 1246 w, 1196 w, 1096 m, 1030 wsh, 949 w, 840 ssh, 787 ssh, 752 msh, 656 wsh, 617 w, 559 ssh, 509 w. ES-MS:  $m/z$  1135.5 ( $[M-PF_6]^+$ ), 495.2 ( $[M-2PF_6]^{2+}$ ). UV-vis ( $CH_3CN$ ):  $\lambda_{max}$  ( $\epsilon$ ) = 284.9 (60900), 310.0 (60400), 490.1 (21300) nm ( $L\ mol^{-1}\ cm^{-1}$ ).

**[Cd(pzt)(NO<sub>3</sub>)<sub>2</sub>], 9.** To the ligand pzt (0.011 g, 0.02 mmol) in CH<sub>2</sub>Cl<sub>2</sub> (5 mL) was added Cd(NO<sub>3</sub>)<sub>2</sub>·4H<sub>2</sub>O (0.006 g, 0.02 mmol) in CH<sub>3</sub>CN (5 mL) dropwise under Ar atmosphere. The reaction mixture was stirred at r.t overnight. The clear solution was

filtered. Colourless crystals were obtained upon slow evaporation of the solution at r.t. The crystals were separated by filtration, washed with diethyl ether, then dried under vacuum. Yield 0.009 g, 56%.  $^1\text{H}$  NMR (500 MHz; solvent dms $\text{-d}_6$ , see Table 3).  $^{13}\text{C}$  NMR (75 MHz; solvent dms $\text{-d}_6$ )  $\delta$  153.25, 149.76, 149.53, 148.66, 141.22, 141.10, 140.32, 135.29, 131.30, 128.42, 128.27, 127.46, 124.04, 121.06, 106.79, 89.51, 72.82, 72.39. IR (KBr,  $\text{cm}^{-1}$ ): 3113 m, 3078 m, 2947 w, 2893 w, 1701 w, 1601 m, 1574 m, 1551 m, 1516 m, 1481 ssh, 1447 ssh, 1385 ssh, 1296 ssh, 1265 ssh, 1204 m, 1165 m, 111m, 1015 msh, 949 m, 918 m, 895 w, 818 m, 791 ssh, 752 m, 660 w, 640 w, 617 w, 513 w, 451 w. ES-MS:  $m/z$  (intensity (%), fragment), 1305.3 (1,  $[\text{Cd}(\text{pzt})_2\text{-NO}_3]^+$ ), 622.3 (100,  $[\text{Cd}(\text{pzt})_2\text{-2NO}_3]^{2+}$ ). Anal. Calc. for  $\text{C}_{33}\text{H}_{27}\text{CdN}_{11}\text{O}_7$  (802.05): C 49.42, H 3.39, N 19.21%; found: C 49.43, H 3.40, N 18.83%.

$\{[\text{Fe}(\text{pzt})_2](\text{NO}_3)_2\}(\text{AgNO}_3)_2\}_\infty$ , **10**. To complex **6** (0.001 g, 0.0007 mmol) in acetone (1 mL) was added a solution of  $\text{AgNO}_3$  (0.0003 g, 0.0014 mmol) in acetonitrile (1 mL), dropwise. The mixture was allowed to slowly evaporate in the air at r.t. The microcrystalline solid which formed the reaction mixture was collected, washed with diethyl ether, and air-dried.  $^1\text{H}$  NMR (500 MHz; solvent acetone- $\text{d}_6$ , see Table 3). ES-MS:  $m/z$  763.26 ( $\{[\text{Fe}(\text{pzt})_2\text{Ag}_2](\text{NO}_3)_2\}^{2+}$ ).

$\{[\text{Fe}(\text{pzt})_2](\text{BF}_4)_2\}(\text{AgBF}_4)_2\}_\infty$ , **11**. To complex **6** (0.001 g, 0.0007 mmol) in acetone (1 mL) was added  $\text{AgBF}_4$  (0.0003 g, 0.0014 mmol) in acetone (1 mL) dropwise. The mixture was allowed to slowly evaporate in the air at r.t. The microcrystalline compound which was crystallized from the reaction mixture was collected, washed with small amount of cold acetone, and air-dried. ES-MS:  $m/z$  691.4 ( $\{[\text{Fe}(\text{pzt})_2\text{Ag}](\text{BF}_4)\}^{2+}$ )

$\{[\text{Fe}(\text{pzt})_2](\text{ClO}_4)_2\}(\text{AgClO}_4)_2\}_\infty$ , **12**. Same method was used as above except  $\text{AgClO}_4$  (0.0003 g, 0.0014 mmol) in acetone (1 mL) was applied instead. ES-MS:  $m/z$  801.23 ( $\{[\text{Fe}(\text{pzt})_2\text{Ag}_2](\text{ClO}_4)_2\}^{2+}$ )



RZ 88-1-3 DIRECT

RAZ0052 147 (2.453) Cm (116:229)

TOF MS ES+  
3.79e4

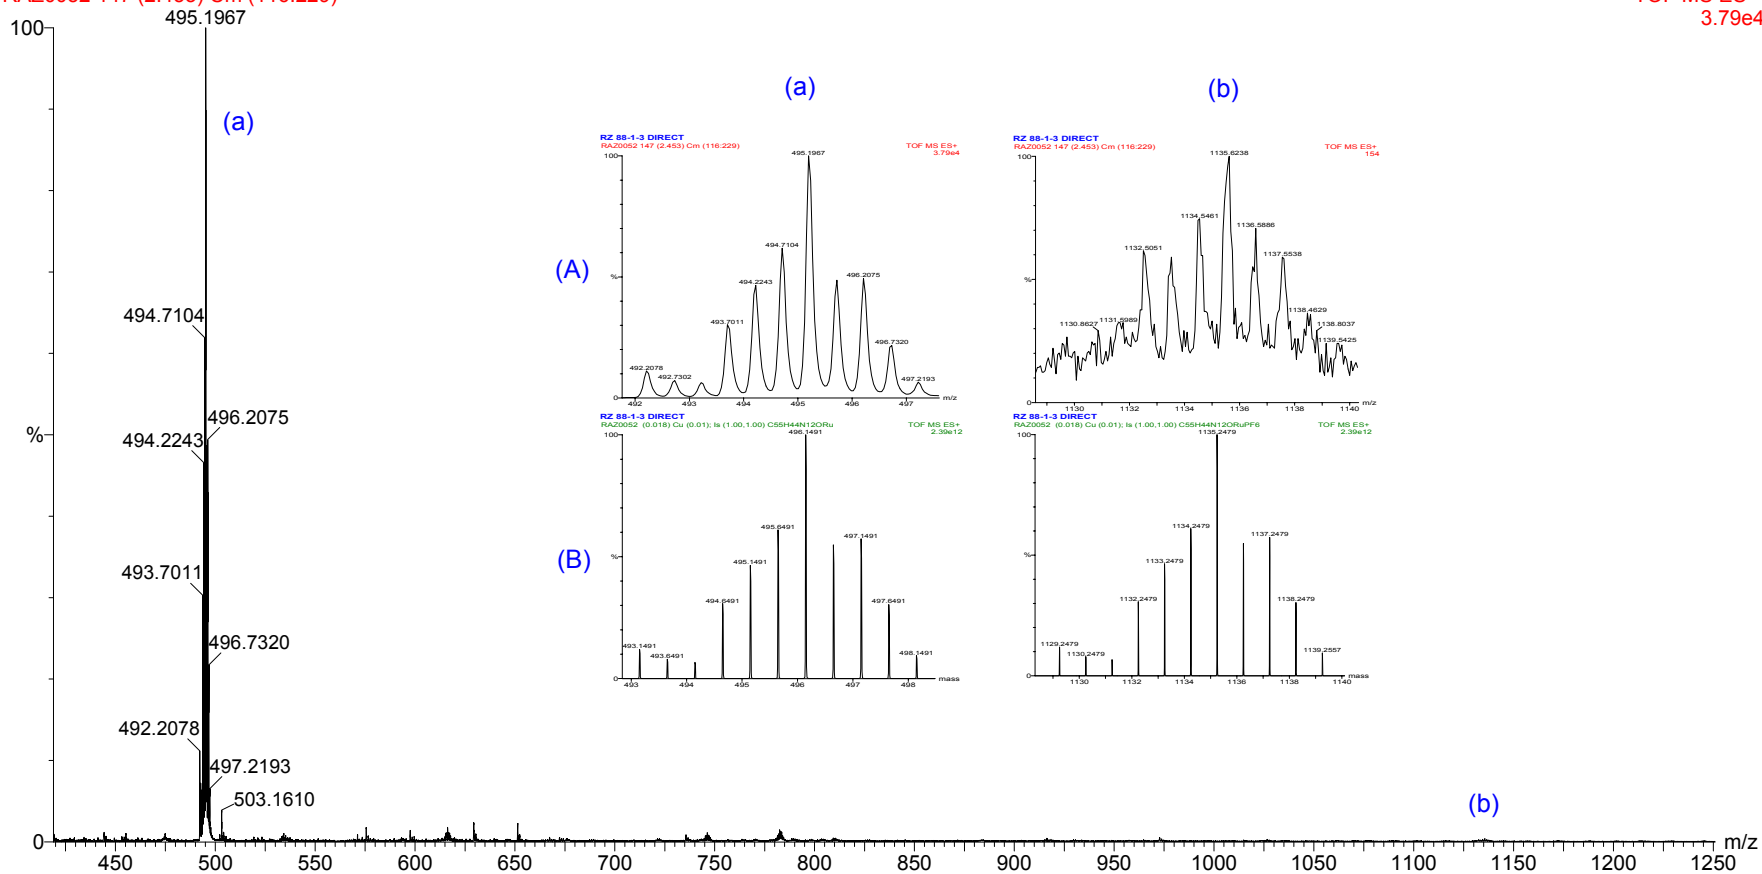

Fig. II. ES-MS of [Ru(pzt)(ttp)](PF<sub>6</sub>)<sub>2</sub> complex in CH<sub>3</sub>CN. (A) High resolution scans of the two signals (a) and (b); (B) Calculated isotope distribution patterns for (a) [Ru(pzt)(ttp)]<sup>2+</sup> and (b) [Ru(pzt)(ttp)+(PF<sub>6</sub>)]<sup>+</sup>.

RZ 94-1 100ng INJECTED DIRECT

RAZ0060 58 (0.581) Cm (28:180)

TOF MS ES+  
2.45e4

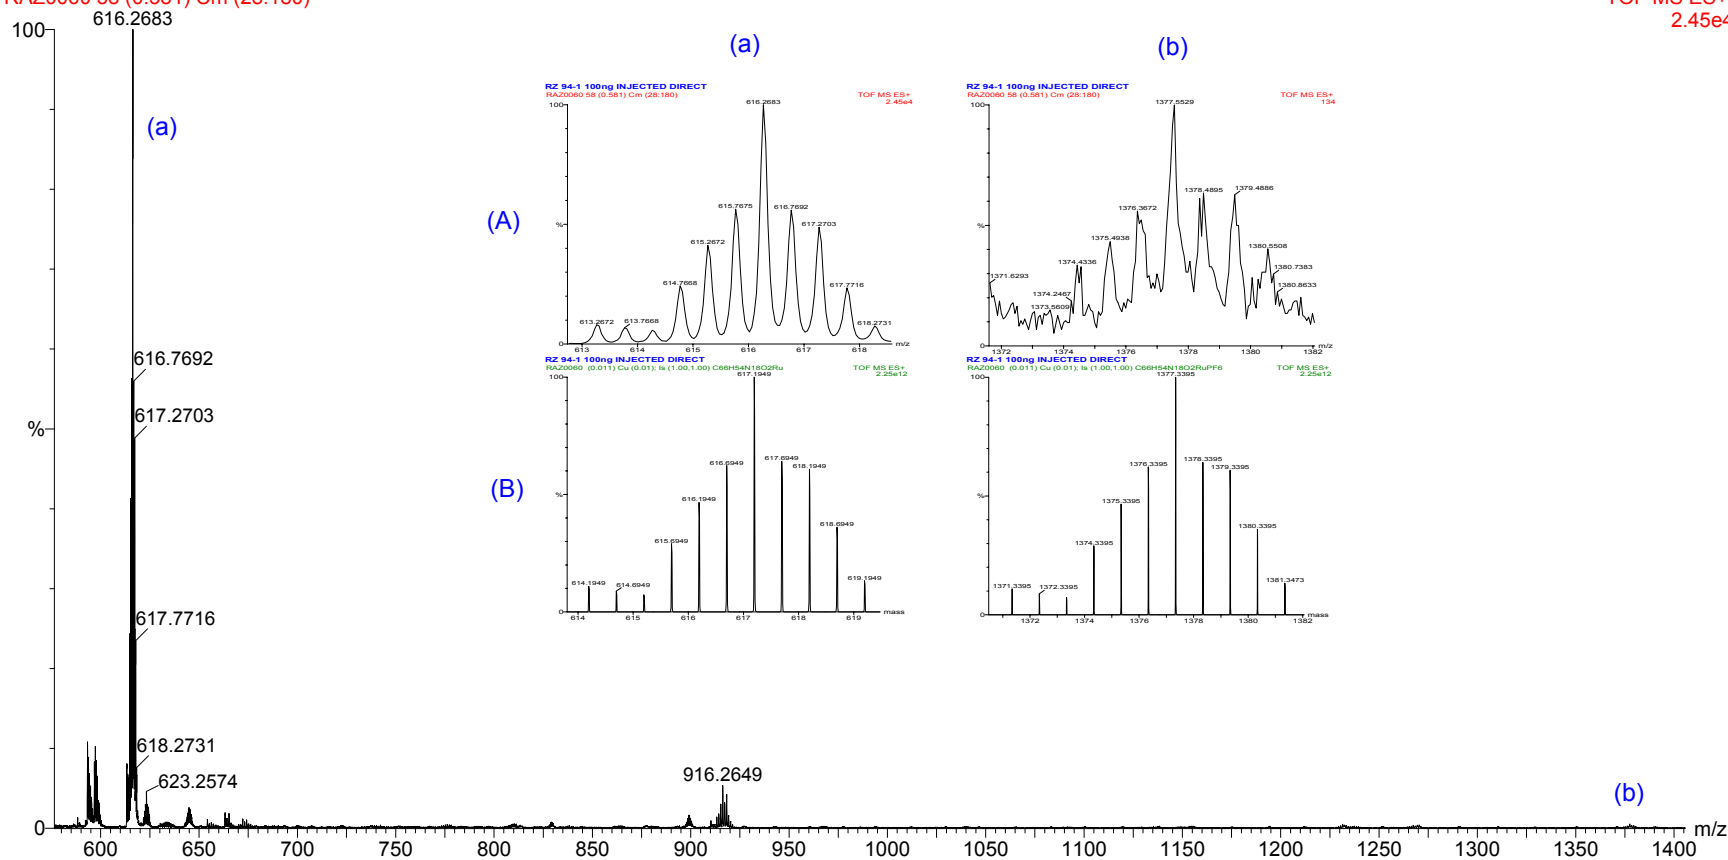

Fig. III. ES-MS of  $[\text{Ru}(\text{pzt})_2](\text{PF}_6)_2$  complex in  $\text{CH}_3\text{CN}$ . (A) High resolution scans of the two major signals (a) and (b); (B) Calculated isotope distribution patterns for (a)  $[\text{Ru}(\text{pzt})_2]^{2+}$  and (b)  $[\text{Ru}(\text{pzt})_2+(\text{PF}_6)]^+$ .

RZ AHAHPZ-1 100ng INJECTED DIRECT

RAZ0062 50 (0.503) Cm (30:230)

TOF MS ES+  
1.50e5

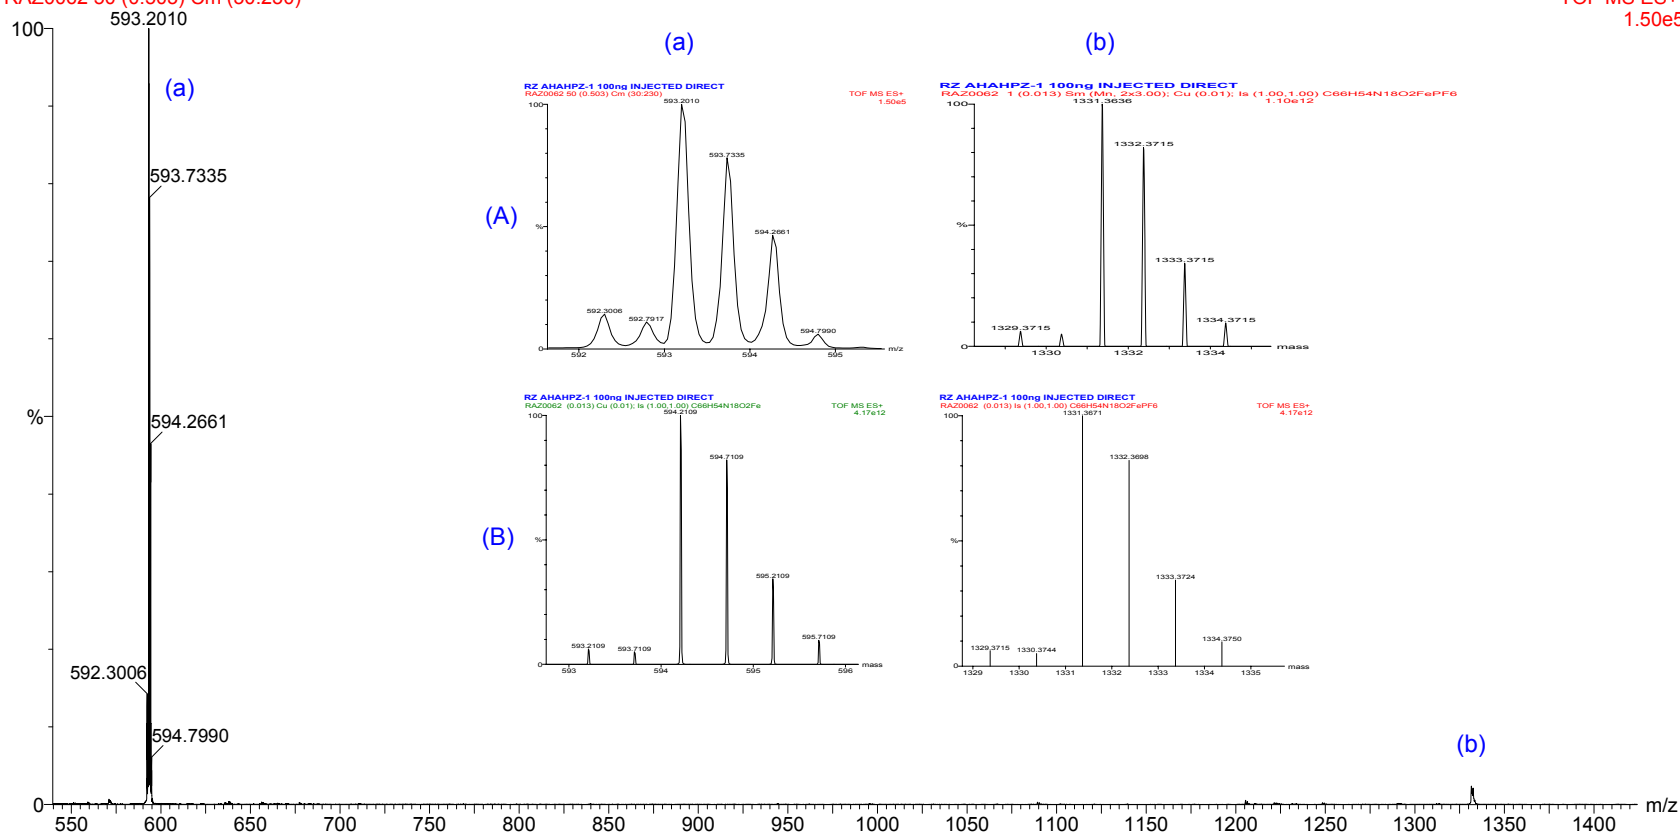

Fig. IV. ES-MS of [Fe(pzt)<sub>2</sub>](PF<sub>6</sub>)<sub>2</sub> complex in CH<sub>3</sub>CN. (A) High resolution scans of the two major signals (a) and (b); (B) Calculated isotope distribution patterns for (a) [Fe(pzt)<sub>2</sub>]<sup>2+</sup> and (b) [Fe(pzt)<sub>2</sub>+(PF<sub>6</sub>)]<sup>+</sup>.



**RZ88-AN**

RAZ0165 216 (3.604) Cm (170:301)

TOF MS ES+  
4.80e4

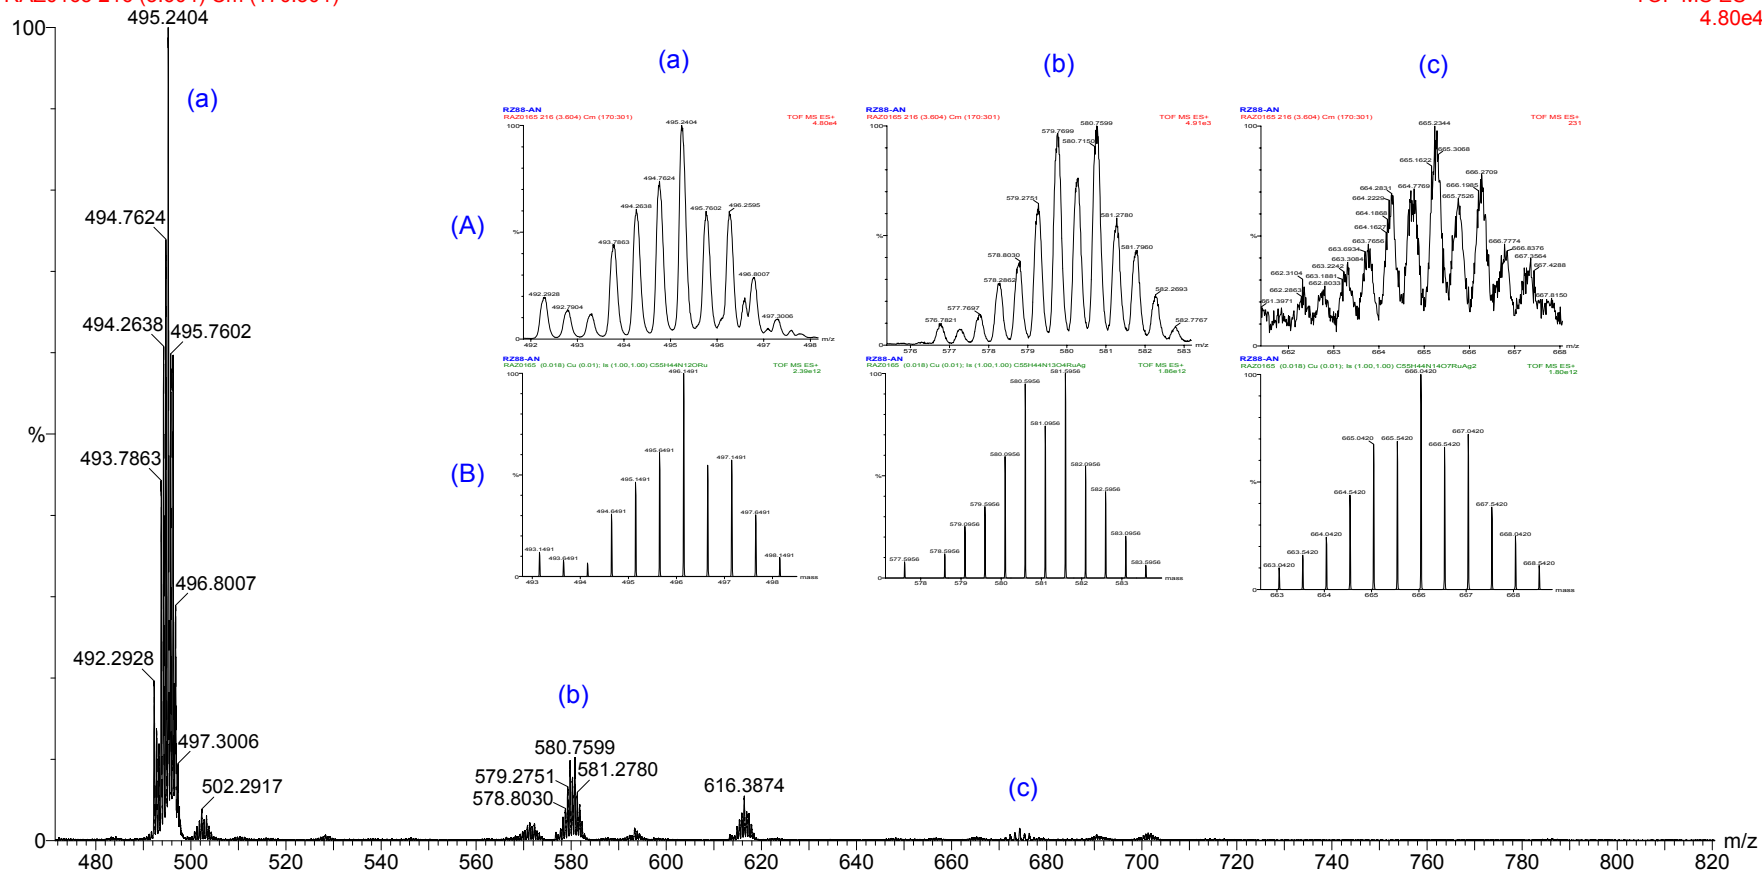

Fig. V. ES-MS of the product obtained from the reaction of  $[\text{Ru}(\text{pzt})(\text{ttp})](\text{PF}_6)_2$  complex with  $\text{AgNO}_3$  in acetone. (A) High resolution scans of the three signals (a), (b), and (c); (B) Calculated isotope distribution patterns for (a)  $[\text{Ru}(\text{pzt})(\text{ttp})]^{2+}$ , (b)  $[\text{Ru}(\text{pzt})(\text{ttp})\text{Ag}(\text{NO}_3)]^{2+}$ , and (c)  $[\text{Ru}(\text{pzt})(\text{ttp})\text{Ag}_2(\text{NO}_3)_2]^{2+}$ .

RZ 158

RAZ0115 240 (4.002) Cm (136:314)

TOF MS ES+  
32

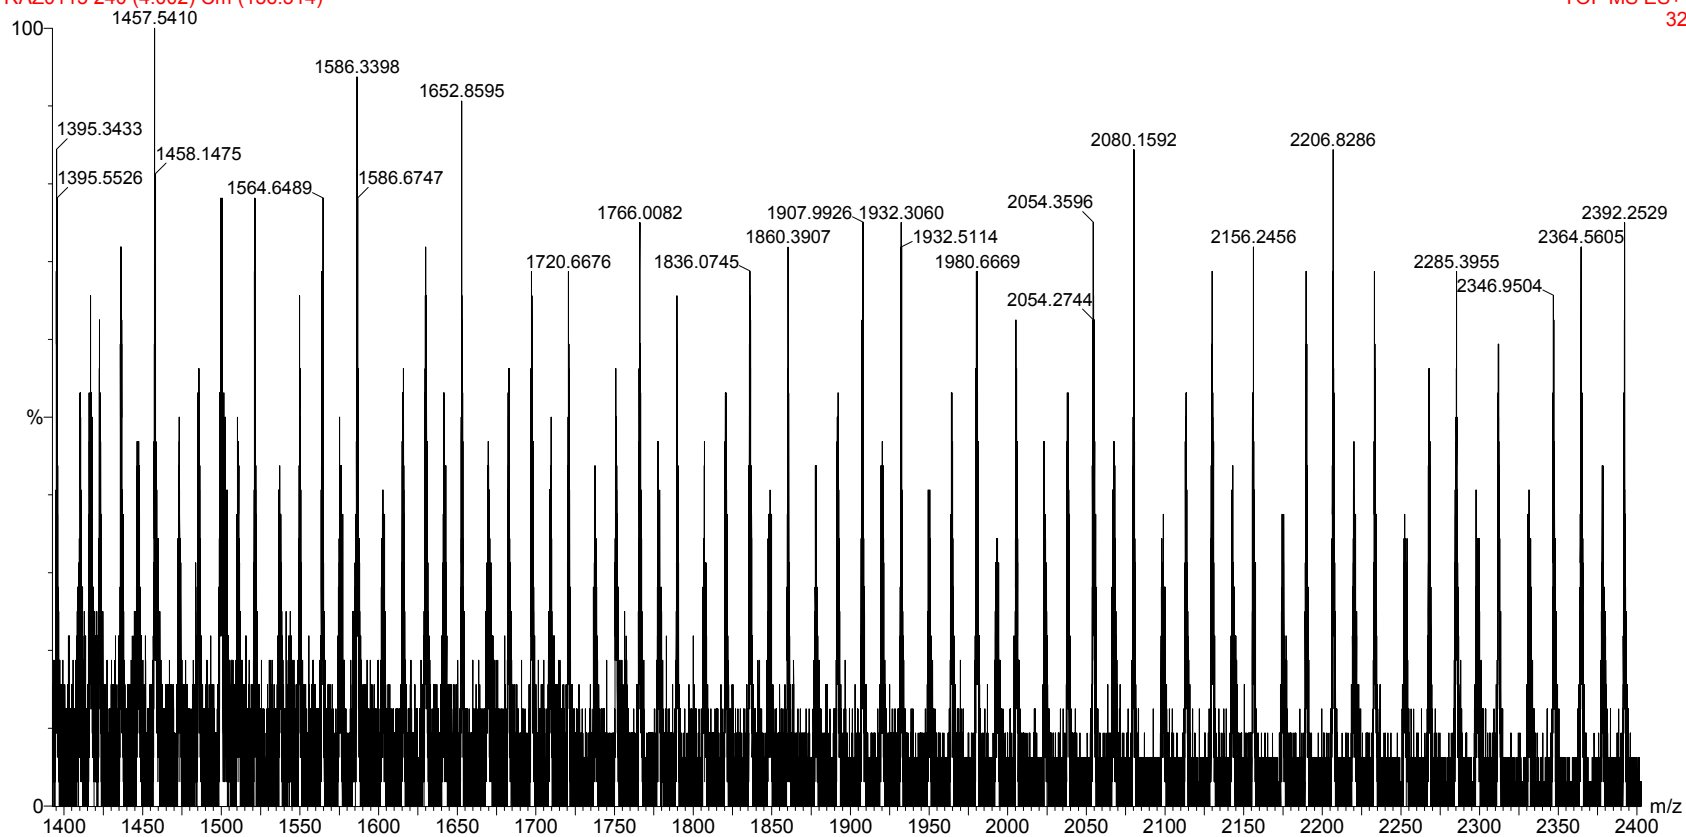

Fig. VI. Expanded region ( $m/z$  1400 to 2400) of ES-MS data for the material formed in the reaction of  $[\text{Fe}(\text{pzt})_2](\text{PF}_6)_2$  with  $\text{AgNO}_3$  in acetone.

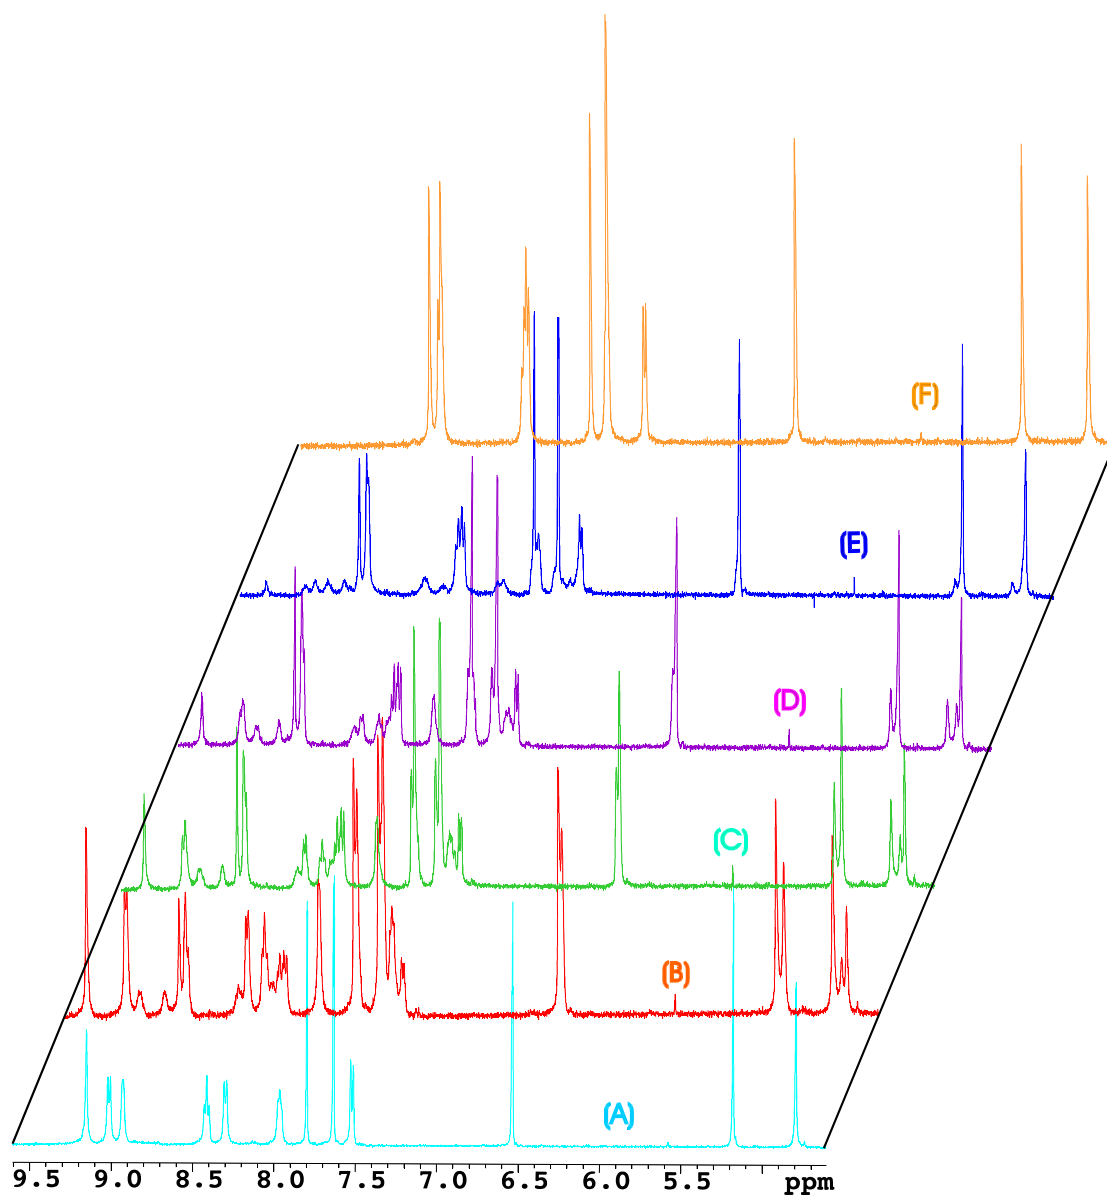

Fig. VII.  $^1\text{H}$ NMR titration of  $[\text{Zn}(\text{pzt})\text{Cl}_3]$  in  $\text{dms0-d}_6$  with  $\text{AgBF}_4$  solution in  $\text{dms0-d}_6$ .

(A)  $[\text{Zn}(\text{pzt})\text{Cl}_3]$  in  $\text{dms0-d}_6$

(B)  $[\text{Zn}(\text{pzt})\text{Cl}_3] + \text{AgBF}_4$  in  $\text{dms0-d}_6$  (1:3)

(C)  $[\text{Zn}(\text{pzt})\text{Cl}_3] + \text{AgBF}_4$  in  $\text{dms0-d}_6$  (1:5)

(D)  $[\text{Zn}(\text{pzt})\text{Cl}_3] + \text{AgBF}_4$  in  $\text{dms0-d}_6$  (1:7)

(E)  $[\text{Zn}(\text{pzt})\text{Cl}_3] + \text{AgBF}_4$  in  $\text{dms0-d}_6$  (1:11)

(F)  $[\text{Zn}(\text{pzt})\text{Cl}_3] + \text{AgBF}_4$  in  $\text{dms0-d}_6$  (1:20)

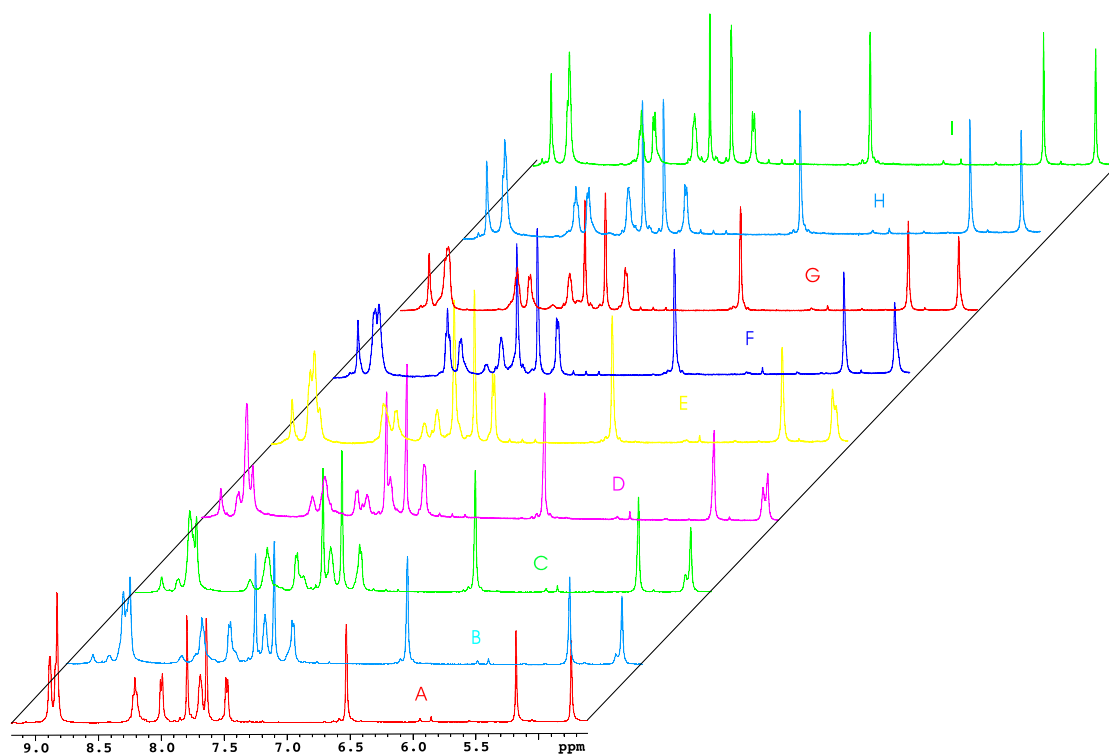

Fig. VIII  $^1\text{H}$ NMR titration of pzt ligand in  $\text{dms0-d}_6$  with  $\text{ZnCl}_2$  solution in  $\text{dms0-d}_6$ .

**A**  $^1\text{H}$ NMR of pzt ligand in  $\text{dms0-d}_6$ .

**E**  $^1\text{H}$ NMR of pzt +  $\text{ZnCl}_2$  in  $\text{dms0-d}_6$  (L:M)(1:0.5).

**I**  $^1\text{H}$ NMR of  $[\text{Zn}(\text{pzt})\text{Cl}_2]$  complex in  $\text{dms0-d}_6$  (L:M)(1:1)

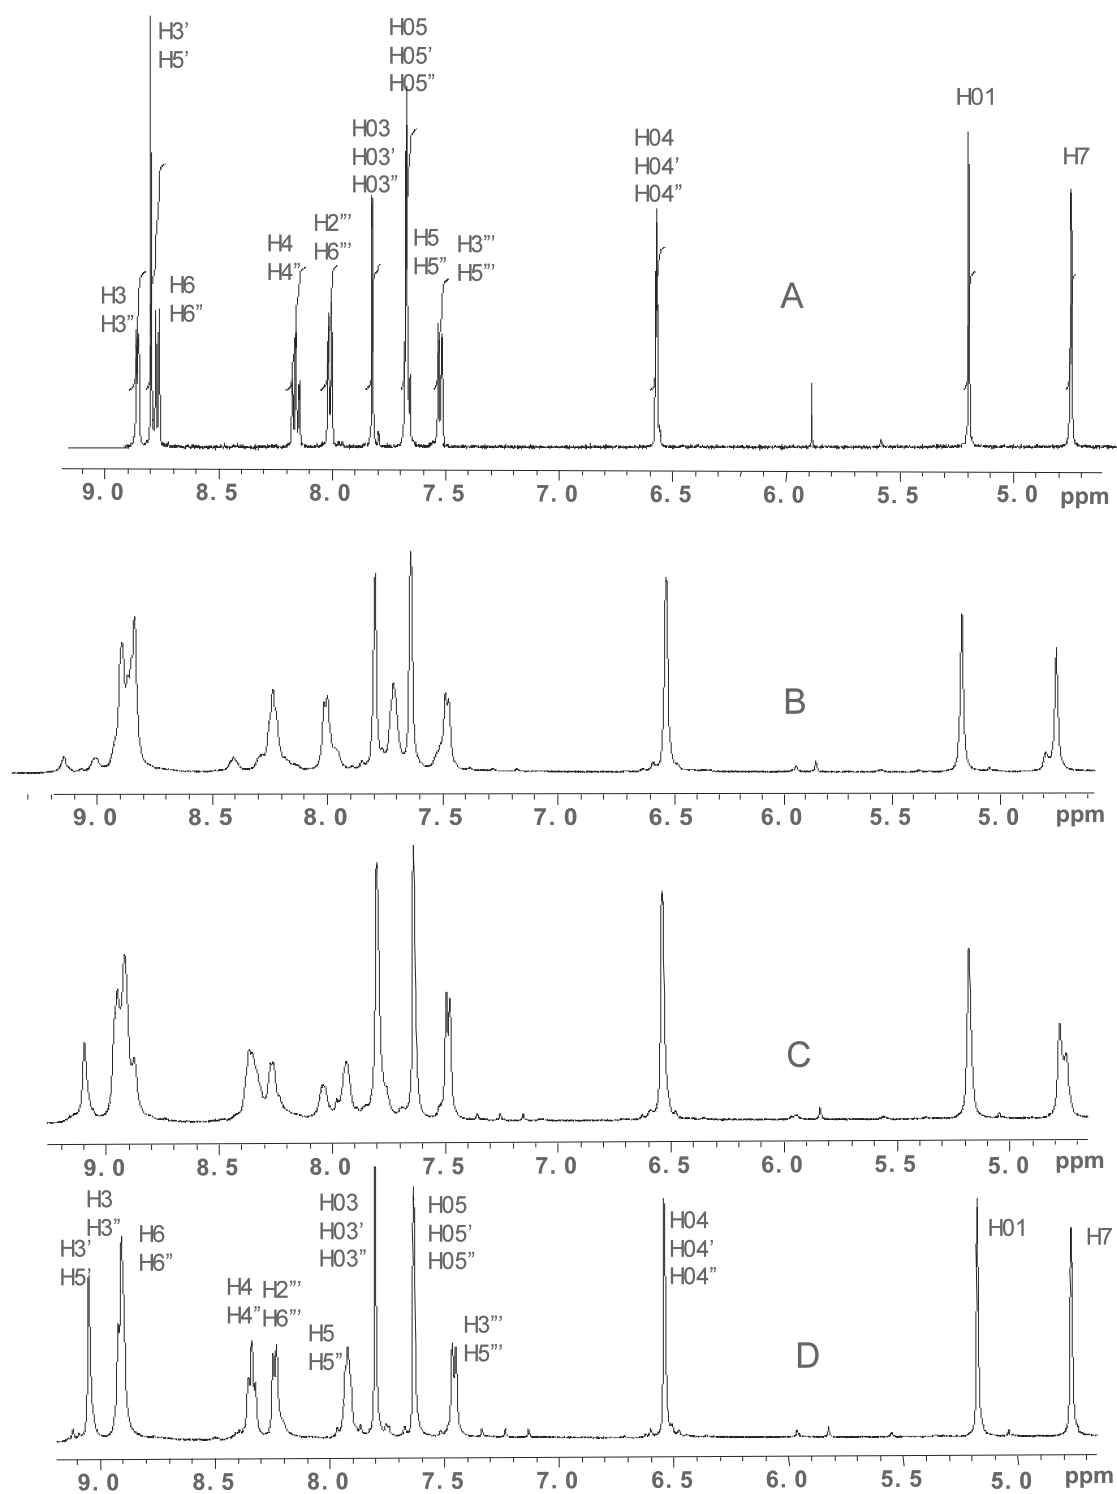

Fig. IX  $^1\text{H}$  NMR titration of pzt ligand in  $\text{dmsd}_6$  with  $\text{ZnCl}_2$  solution in  $\text{dmsd}_6$ .

A  $^1\text{H}$  NMR of pzt ligand in  $\text{dmsd}_6$ .

B  $^1\text{H}$  NMR of pzt +  $\text{ZnCl}_2$  in  $\text{dmsd}_6$  (L:M)(1:0.1).

C  $^1\text{H}$  NMR of pzt +  $\text{ZnCl}_2$  in  $\text{dmsd}_6$  (L:M)(1:0.5).

Electronic Supplementary Information for Dalton Transactions  
This journal is © The Royal Society of Chemistry 2005

**D**  $^1\text{NMR}$  of  $[\text{Zn}(\text{pzt})\text{Cl}_2]$  complex in  $\text{dms}\text{-d}_6$  (L:M)(1:1)
